# Supplementary material for: Global methylation correlates with clinical status in multiple sclerosis patients in the first year of IFNbeta treatment
Source: PubMed Central journal article supplement (PMC5562733; doi:10.1038/s41598-017-09301-2), 2017-08-18
Supplement: 41598_2017_9301_MOESM1_ESM.pdf [file 41598_2017_9301_MOESM1_ESM.pdf]

**Global methylation correlates with clinical status in multiple sclerosis patients in the first year of IFNbeta treatment**

María Jesús Pinto-Medel\*, Begoña Oliver-Martos, Patricia Urbaneja-Romero, Isaac Hurtado-Guerrero, Jesús Ortega-Pinazo, Pedro Serrano-Castro, Óscar Fernández, Laura Leyva Fernández

**Supplementary Fig. S1:** Standard curve of global DNA methylation.

| Expected values | Observed values | $X^2=(O-E)^2/E$       |     |
|-----------------|-----------------|-----------------------|-----|
| 60.40           | 60.36           | $3.35 \times 10^{-5}$ | n.s |
| 64.50           | 63.42           | $1.82 \times 10^{-2}$ | n.s |
| 64.84           | 62.72           | $6.93 \times 10^{-2}$ | n.s |
| 65.19           | 63.79           | $3.03 \times 10^{-2}$ | n.s |
| 65.52           | 65.54           | $6.10 \times 10^{-6}$ | n.s |
| 65.86           | 64.94           | $1.30 \times 10^{-2}$ | n.s |
| 66.55           | 68.78           | $7.47 \times 10^{-2}$ | n.s |
| 67.72           | 65.53           | $7.08 \times 10^{-2}$ | n.s |
| 68.60           | 68.58           | $9.11 \times 10^{-6}$ | n.s |

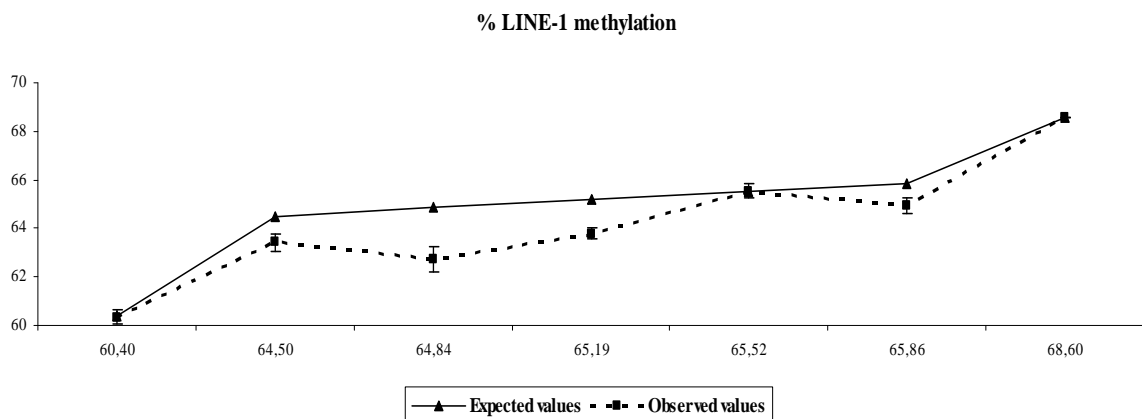

Values observed and expected for every point of the curve.
